# Supplementary material for: Negative Relationship between Post-Treatment Stromal Tumor-Infiltrating Lymphocyte (TIL) and Survival in Triple-Negative Breast Cancer Patients Treated with Dose-Dense Dose-Intense NeoAdjuvant Chemotherapy
Source: MDPI journal article supplement (doi:10.3390/cancers14051331), 2022-03-04
Supplement: s1 [file s1]

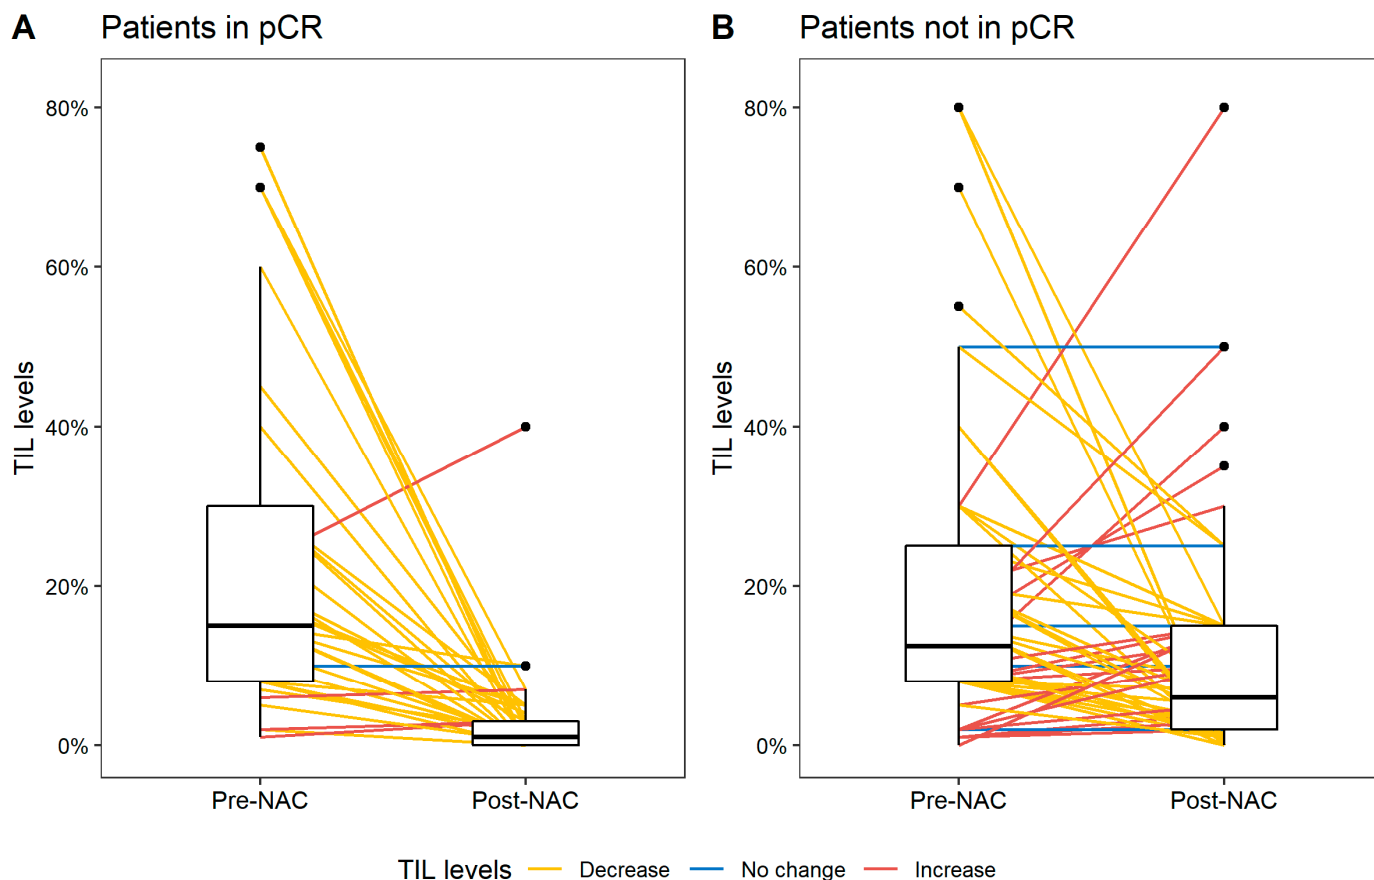

**Figure S1.** Change in TIL levels after NAC, according to the response to NAC, A: Change in TIL levels for the patients that achieved pCR, B: Change in TIL levels for the patients that did not achieve pCR.

**Table S1.** Predictive factors associated with pre-NAC TIL levels in univariate analyses.

|                                     | Levels         | coefficient | [95% CI]       | P-value      |
|-------------------------------------|----------------|-------------|----------------|--------------|
| <b>Pre-NAC parameters</b>           |                |             |                |              |
| <b>Age (class)</b>                  | <45            |             |                |              |
|                                     | ≥45            | -0.3        | [-0.73 ; 0.13] | 0.173        |
| <b>Pregnancies</b>                  | 0              |             |                |              |
|                                     | 1-3            | 0.21        | [-0.23 ; 0.65] | 0.347        |
|                                     | >3             | -0.11       | [-0.7 ; 0.48]  | 0.709        |
| <b>Menopausal status</b>            | premenopausal  |             |                |              |
|                                     | postmenopausal | -0.15       | [-0.54 ; 0.23] | 0.43         |
| <b>Family history</b>               | 0              |             |                |              |
|                                     | 1              | 0.11        | [-0.39 ; 0.61] | 0.67         |
|                                     | ≥2             | 0.47        | [-0.16 ; 1.1]  | 0.14         |
| <b>Clinical tumor stage</b>         | T1-T2          |             |                |              |
|                                     | T3             | -0.26       | [-0.64 ; 0.13] | 0.186        |
| <b>Clinical nodal status</b>        | N-             |             |                |              |
|                                     | N+             | 0.086       | [-0.3 ; 0.47]  | 0.658        |
| <b>Tumor grade</b>                  | 2              |             |                |              |
|                                     | 3              | 0.25        | [-0.25 ; 0.74] | 0.33         |
| <b>LVI</b>                          | Absence        |             |                |              |
|                                     | Presence       | 0.13        | [-0.39 ; 0.64] | 0.63         |
| <b>SUV (continuous)<sup>a</sup></b> |                |             |                | <b>0.025</b> |
| <b>Chemotherapy regimen</b>         | SIM-1          |             |                | *            |

|                                                                                                                                                                             |       |       |                |       |
|-----------------------------------------------------------------------------------------------------------------------------------------------------------------------------|-------|-------|----------------|-------|
|                                                                                                                                                                             | SIM-2 | -0.13 | [-0.58 ; 0.32] | 0.563 |
| <sup>a</sup> continuous variable modeled with a degree 3 polynomial (coefficients and IC : -0.3 [-0.62 ; 0.025] ; 0.024 [0.0013 ; 0.047] ; -0.0005 [-0.00098 ; -0.000018]). |       |       |                |       |

**Table S2.** Predictive factors associated with SUV relative variation.

| Parameters                           | Levels         | Univariate analyses |                  |         | Multivariate analysis |        |                |        |     |
|--------------------------------------|----------------|---------------------|------------------|---------|-----------------------|--------|----------------|--------|-----|
|                                      |                | coefficient         | IC 95%           | p-value | coefficient           | IC 95% | p-value        |        |     |
| Pre-NAC parameters                   |                |                     |                  |         |                       |        |                |        |     |
| Age (class)                          | <45            |                     |                  |         |                       |        |                |        |     |
|                                      | ≥45            | -1.4                | [-13 ; 9.7]      | 0.804   |                       |        |                |        |     |
| Pregnancies                          | 0              |                     |                  |         |                       |        |                |        |     |
|                                      | 1-3            | -4.2                | [-16 ; 7.4]      | 0.476   |                       |        |                |        |     |
|                                      | >3             | 3.1                 | [-13 ; 20]       | 0.709   |                       |        |                |        |     |
| Menopausal status                    | premenopausal  |                     |                  |         |                       |        |                |        |     |
|                                      | postmenopausal | 1.8                 | [-8.5 ; 12]      | 0.728   |                       |        |                |        |     |
| Family history                       | 0              |                     |                  |         |                       |        |                |        |     |
|                                      | 1              | 3.7                 | [-8.9 ; 16.2]    | 0.57    |                       |        |                |        |     |
|                                      | ≥2             | 15.7                | [-0.85 ; 32.3]   | 0.063   |                       |        |                |        |     |
| Clinical tumor stage                 | T1-T2          |                     |                  |         |                       | 12.3   | [3.3 ; 21.4]   | 0.008  | **  |
|                                      | T3             | 16.4                | [6.8 ; 26]       | <0.001  | ***                   |        |                |        |     |
| Clinical nodal status                | N-             |                     |                  |         |                       |        |                |        |     |
|                                      | N+             | 4.9                 | [-5.2 ; 15]      | 0.337   |                       |        |                |        |     |
| Tumor grade                          | 2              |                     |                  |         |                       |        |                |        |     |
|                                      | 3              | -25.3               | [-39 ; -12]      | <0.001  | ***                   | -22.3  | [-34.8 ; -9.8] | 0.0007 | *** |
| LVI                                  | Absence        |                     |                  |         |                       |        |                |        |     |
|                                      | Presence       | 7                   | [-6.1 ; 20.1]    | 0.29    |                       |        |                |        |     |
| SUV                                  |                | -0.66               | [-1.6 ; 0.22]    | 0.14    |                       |        |                |        |     |
| TIL levels (continuous) <sup>a</sup> |                | -0.32               | [-0.56 ; -0.079] | 0.010   | **                    |        |                | 0.042  | *   |

<sup>a</sup>continuous variable modeled with a degree 3 polynomial in the multivariate analysis (coefficients and IC : -59.1 [-111 ; -7.1] ; 19.4 [-29.8 ; 68.5] ; -50.6 [-100 ; -1.1]).

**Table S3.** Predictive factors associated with TIL levels absolute variation.

| Parameters                           | Levels         | coefficient | [95% CI]       | P-value     |
|--------------------------------------|----------------|-------------|----------------|-------------|
| <b>Pre-NAC parameters</b>            |                |             |                |             |
| Age (class)                          | <45            |             |                |             |
|                                      | ≥45            | -3.2        | [-14 ; 7.5]    | 0.555       |
| Pregnancies                          | 0              |             |                |             |
|                                      | 1-3            | -6.6        | [-18 ; 4.3]    | 0.234       |
|                                      | >3             | 1.6         | [-13 ; 16]     | 0.825       |
| Menopausal status                    | premenopausal  |             |                |             |
|                                      | postmenopausal | -2.2        | [-12 ; 7.4]    | 0.647       |
| Family history                       | 0              |             |                |             |
|                                      | 1              | 1.7         | [-11.3 ; 14.7] | 0.79        |
|                                      | ≥2             | 6.6         | [-9.4 ; 22.6]  | 0.41        |
| Clinical tumor stage                 | T1-T2          |             |                |             |
|                                      | T3             | 9.4         | [-0.0091 ; 19] | 0.05 .      |
| Clinical nodal status                | N-             |             |                |             |
|                                      | N+             | 1.9         | [-7.7 ; 11]    | 0.7         |
| Tumor grade                          | 2              |             |                |             |
|                                      | 3              | -0.83       | [-13 ; 12]     | 0.895       |
| LVI                                  | Absence        |             |                |             |
|                                      | Presence       | 9.2         | [-4.4 ; 22.7]  | 0.18        |
| SUV                                  |                | -0.93       | [-1.7 ; -0.11] | 0.027 *     |
| TIL levels (continuous) <sup>a</sup> |                |             |                | <0.0001 *** |
| Chemotherapy regimen                 | SIM-1          |             |                |             |

|                                          |          |       |                |         |             |
|------------------------------------------|----------|-------|----------------|---------|-------------|
|                                          | SIM-2    | 5.7   | [-5.8 ; 17]    | 0.326   |             |
| <b>Post-NAC parameters</b>               |          |       |                |         |             |
| pCR                                      | No pCR   |       |                |         |             |
|                                          | pCR      | -14.3 | [-24 ; -5.1]   | 0.003   | **          |
| Nodal involvement                        | ypN-     |       |                |         |             |
|                                          | ypN+     | 3.9   | [-6.8 ; 14.6]  | 0.47    |             |
| LVI                                      | Absence  |       |                |         |             |
|                                          | Presence | 3.7   | [-13.2 ; 20.6] | 0.67    |             |
| SUV at 2 cures                           |          | 0.93  | [-0.23 ; 2.1]  | 0.11    |             |
| <b>Variation Pre/Post-NAC parameters</b> |          |       |                |         |             |
| SUV relative variation <sup>b</sup>      |          |       |                |         | <0.0001 *** |
| SUV relative variation (class)           | < -70%   |       |                |         |             |
|                                          | ≥ -70%   | 19.5  | [10 ; 29]      | <0.0001 | ***         |

<sup>a</sup>continuous variable modeled with a degree 2 polynomial (coefficients and IC : -0.46 [-0.9 ; -0.016] ; -0.007 [-0.013 ; 60.0011]), <sup>b</sup>continuous variable modeled with a degree 2 polynomial (coefficients and IC : -0.5 [-1.2 ; 0.22] ; 60.0084 [-0.015 ; -0.0018]).

**Table S4.** Predictive factors associated with pCR status.

| Parameters                           | Levels         | OR   | Univariate analyses |         | Multivariate analysis |          |                |         |     |
|--------------------------------------|----------------|------|---------------------|---------|-----------------------|----------|----------------|---------|-----|
|                                      |                |      | [95% CI]            | P-value | OR                    | [95% CI] | P-value        |         |     |
| Pre-NAC parameters                   |                |      |                     |         |                       |          |                |         |     |
| Age (class)                          | <45            | 1    |                     |         |                       |          |                |         |     |
|                                      | ≥45            | 1.5  | [0.65 ; 3.4]        | 0.36    |                       |          |                |         |     |
| Pregnancies                          | 0              | 1    |                     |         |                       |          |                |         |     |
|                                      | 1-3            | 1.2  | [0.51 ; 2.8]        | 0.67    |                       |          |                |         |     |
|                                      | >3             | 0.98 | [0.3 ; 3.2]         | 0.97    |                       |          |                |         |     |
| Menopausal status                    | premenopausal  | 1    |                     |         |                       |          |                |         |     |
|                                      | postmenopausal | 0.93 | [0.44 ; 2]          | 0.84    |                       |          |                |         |     |
| Family history                       | 0              | 1    |                     |         |                       |          |                |         |     |
|                                      | 1              | 0.99 | [0.37 ; 2.6]        | 0.99    |                       |          |                |         |     |
|                                      | ≥2             | 0.67 | [0.18 ; 2.4]        | 0.54    |                       |          |                |         |     |
| Clinical tumor stage                 | T1-T2          | 1    |                     |         |                       |          |                |         |     |
|                                      | T3             | 0.49 | [0.23 ; 1]          | 0.064   |                       |          |                |         |     |
| Clinical nodal status                | N-             | 1    |                     |         |                       |          |                |         |     |
|                                      | N+             | 0.7  | [0.33 ; 1.5]        | 0.34    |                       |          |                |         |     |
| Tumor grade                          | 2              | 1    |                     |         |                       |          |                |         |     |
|                                      | 3              | 3.2  | [0.99 ; 10.3]       | 0.053   |                       |          |                |         |     |
| LVI                                  | Absence        | 1    |                     |         |                       |          |                |         |     |
|                                      | Presence       | 0.62 | [0.21 ; 1.8]        | 0.38    |                       |          |                |         |     |
| TIL levels (continuous)              |                | 1    | [1 ; 1]             | 0.11    |                       |          |                |         |     |
| Chemotherapy regimen                 | SIM-1          | 1    |                     |         |                       |          |                |         |     |
|                                      | SIM-2          | 0.77 | [0.32 ; 1.9]        | 0.56    |                       |          |                |         |     |
| Post-NAC parameters                  |                |      |                     |         |                       |          |                |         |     |
| TIL levels (continuous) <sup>a</sup> |                | 0.29 | [0.13 ; 0.64]       | 0.002   | **                    | 0.38     | [0.17 ; 0.87]  | 0.023   | *   |
|                                      |                |      |                     |         |                       |          |                |         |     |
| SUV relative variation               |                | 0.93 | [0.91 ; 0.96]       | <0.0001 | ***                   |          |                |         |     |
| SUV relative variation (class)       | < -70%         | 1    |                     |         |                       | 1        |                |         |     |
|                                      | ≥ -70%         | 0.06 | [0.022 ; 0.16]      | <0.0001 | ***                   | 0.076    | [0.027 ; 0.22] | <0.0001 | *** |
| TILs absolute variation              | <0             | 1    |                     |         |                       |          |                |         |     |
|                                      | ≥0             | 0.15 | [0.053 ; 0.44]      | 0.0007  | ***                   |          |                |         |     |

<sup>a</sup> this OR corresponds to difference of 10 units of the variable (for example, the univariate analysis reveals that a patient with post-NAC TIL levels of 15% will have 3.4 (=1/0.29) times the risk of a non pCR than that of a patient with a level of 5%).

**Table S5.** Predictive factors associated with overall survival.

| Parameters                           | Levels         | HR   | Univariate analyses |         | Multivariate analysis |          |              |         |     |  |
|--------------------------------------|----------------|------|---------------------|---------|-----------------------|----------|--------------|---------|-----|--|
|                                      |                |      | [95% CI]            | P-value | HR                    | [95% CI] | P-value      |         |     |  |
| Pre-NAC parameters                   |                |      |                     |         |                       |          |              |         |     |  |
| Age (class)                          | <45            | 1    |                     |         |                       |          |              |         |     |  |
|                                      | ≥45            | 0.53 | [0.2 ; 1.4]         | 0.21    |                       |          |              |         |     |  |
| Pregnancies                          | 0              | 1    |                     |         |                       |          |              |         |     |  |
|                                      | 1-3            | 0.72 | [0.25 ; 2.1]        | 0.54    |                       |          |              |         |     |  |
|                                      | >3             | 0.75 | [0.15 ; 3.7]        | 0.73    |                       |          |              |         |     |  |
| Menopausal status                    | premenopausal  | 1    |                     |         |                       |          |              |         |     |  |
|                                      | postmenopausal | 0.33 | [0.093 ; 1.2]       | 0.082   | .                     |          |              |         |     |  |
| Family history                       | 0              | 1    |                     |         |                       |          |              |         |     |  |
|                                      | 1              | 0.8  | [0.18 ; 3.6]        | 0.78    |                       |          |              |         |     |  |
|                                      | ≥2             | 2.6  | [0.71 ; 9.2]        | 0.15    |                       |          |              |         |     |  |
| Clinical tumor stage                 | T1-T2          | 1    |                     |         |                       |          |              |         |     |  |
|                                      | T3             | 1.7  | [0.63 ; 4.8]        | 0.28    |                       |          |              |         |     |  |
| Clinical nodal status                | N-             | 1    |                     |         |                       |          |              |         |     |  |
|                                      | N+             | 2.1  | [0.73 ; 6.1]        | 0.17    |                       |          |              |         |     |  |
| Tumor grade                          | 2              | 1    |                     |         |                       |          |              |         |     |  |
|                                      | 3              | 2.2  | [0.29 ; 16.9]       | 0.44    |                       |          |              |         |     |  |
| LVI                                  | Absence        | 1    |                     |         |                       |          |              |         |     |  |
|                                      | Presence       | 2.3  | [0.73 ; 7.4]        | 0.15    |                       |          |              |         |     |  |
| TIL levels (continuous)              |                | 0.98 | [0.95 ; 1]          | 0.26    |                       |          |              |         |     |  |
| Post-NAC parameters                  |                |      |                     |         |                       |          |              |         |     |  |
| pCR                                  | No pCR         | 1    |                     |         |                       |          |              |         |     |  |
|                                      | pCR            | 0.4  | [0.13 ; 1.3]        | 0.12    |                       |          |              |         |     |  |
| Nodal involment                      | ypN-           | 1    |                     |         |                       |          |              |         |     |  |
|                                      | ypN+           | 3.1  | [1.2 ; 8.4]         | 0.023   | *                     |          |              |         |     |  |
| LVI                                  | Absence        | 1    |                     |         |                       | 1        |              |         |     |  |
|                                      | Presence       | 4.4  | [1.4 ; 13.8]        | 0.011   | *                     | 4.8      | [1.5 ; 15.7] | 0.009   | **  |  |
| TIL levels (continuous) <sup>a</sup> |                | 1.7  | [1.3 ; 2.2]         | 0.0001  | ***                   | 1.8      | [1.3 ; 2.3]  | <0.0001 | *** |  |
| Variation Pre/Post-NAC parameters    |                |      |                     |         |                       |          |              |         |     |  |
| SUV relative variation               |                | 1    | [0.99 ; 1]          | 0.35    |                       |          |              |         |     |  |
| SUV relative variation (class)       | < -70%         | 1    |                     |         |                       |          |              |         |     |  |
|                                      | ≥ -70%         | 3.2  | [1 ; 10.2]          | 0.048   | *                     |          |              |         |     |  |
| TILs absolute variation              | <0             | 1    |                     |         |                       |          |              |         |     |  |
|                                      | ≥0             | 3.1  | [1.1 ; 8.8]         | 0.031   | *                     |          |              |         |     |  |

<sup>a</sup> this HR corresponds to difference of 10 units of the variable (for example, the univariate analysis reveals that a patient with post-NAC TIL levels of 25% will have 1.7 times the risk of death than that of a patient with a level of 15%).

**Table S6.** Predictive factors associated with overall survival for the Non-pCR subcohort.

| Parameters           | Levels         | HR   | Univariate analyses |         | Multivariate analysis |          |         |
|----------------------|----------------|------|---------------------|---------|-----------------------|----------|---------|
|                      |                |      | [95% CI]            | P-value | HR                    | [95% CI] | P-value |
| Pre-NAC parameters   |                |      |                     |         |                       |          |         |
| Age (factor)         | <45            | 1    |                     |         |                       |          |         |
|                      | ≥45            | 0.59 | [0.19 ; 1.9]        | 0.38    |                       |          |         |
| Pregnancies          | 0              | 1    |                     |         |                       |          |         |
|                      | 1-3            | 1.5  | [0.38 ; 5.8]        | 0.57    |                       |          |         |
|                      | >3             | 1.6  | [0.26 ; 9.4]        | 0.63    |                       |          |         |
| Menopausal status    | premenopausal  | 1    |                     |         |                       |          |         |
|                      | postmenopausal | 0.25 | [0.054 ; 1.1]       | 0.071   | .                     |          |         |
| Family history       | 0              | 1    |                     |         |                       |          |         |
|                      | 1              | 0.45 | [0.057 ; 3.5]       | 0.45    |                       |          |         |
|                      | ≥2             | 1.6  | [0.35 ; 7.6]        | 0.53    |                       |          |         |
| Clinical tumor stage | T1-T2          | 1    |                     |         |                       |          |         |
|                      | T3             | 1.6  | [0.48 ; 5.3]        | 0.45    |                       |          |         |

|                                          |          |     |               |        |     |     |              |        |     |
|------------------------------------------|----------|-----|---------------|--------|-----|-----|--------------|--------|-----|
| Clinical nodal status                    | N-       | 1   |               |        |     |     |              |        |     |
|                                          | N+       | 1.7 | [0.53 ; 5.8]  | 0.36   |     |     |              |        |     |
| LVI                                      | Absence  | 1   |               |        |     |     |              |        |     |
|                                          | Presence | 2.4 | [0.65 ; 9.1]  | 0.18   |     |     |              |        |     |
| TIL levels                               |          | 1   | [0.97 ; 1]    | 0.90   |     |     |              |        |     |
| <b>Post-NAC parameters</b>               |          |     |               |        |     |     |              |        |     |
| Nodal involvement                        | ypN-     | 1   |               |        |     |     |              |        |     |
|                                          | ypN+     | 2.5 | [0.69 ; 9.4]  | 0.16   |     |     |              |        |     |
| LVI                                      | Absence  | 1   |               |        |     | 1   |              |        |     |
|                                          | Presence | 3.6 | [1 ; 12.2]    | 0.042  | *   | 5.5 | [1.4 ; 22.1] | 0.016  | *   |
| TIL levels (continuous) <sup>a</sup>     |          | 1.8 | [1.3 ; 2.4]   | 0.0003 | *** | 2   | [1.4 ; 2.8]  | 0.0001 | *** |
| <b>Variation Pre/Post-NAC parameters</b> |          |     |               |        |     |     |              |        |     |
| SUV relative variation                   |          | 1   | [0.98 ; 1]    | 0.74   |     |     |              |        |     |
| SUV relative variation (factor)          | < -70%   | 1   |               |        |     |     |              |        |     |
|                                          | ≥ -70%   | 3.9 | [0.49 ; 30.8] | 0.20   |     |     |              |        |     |
| TILs absolute variation                  | <0       | 1   |               |        |     |     |              |        |     |
|                                          | ≥0       | 3.8 | [1 ; 14.3]    | 0.048  | *   |     |              |        |     |

<sup>a</sup> this HR corresponds to difference of 10 units of the variable (for example, the univariate analysis reveals that a patient with post-NAC TIL levels of 20% will have 1.8 times the risk of death than that of a patient with a level of 10%).
